# Supplementary material for: Shared larval rearing environment, sex, female size and genetic diversity shape Ae. albopictus bacterial microbiota
Source: PLoS One. 2018 Apr 11;13(4):e0194521. doi: 10.1371/journal.pone.0194521 (PMC5894977; doi:10.1371/journal.pone.0194521)
Supplement: S3 Table — (XLSX) [file pone.0194521.s004.xlsx]

## Sheet: Table_S3_Alpha_diversity_summar
Table S3. Alpha diversity and size summary
Category	Category Name	Mean Richness	Sd Richness	Mean Shannon index	Sd Shannon index	Mean size	Sd size
Origin	La Réunion Island (LR)	49.98	12.37	3.02	0.44	4.70	0.72
	Montpellier (M)	50.57	11.73	3.03	0.40	4.59	0.67
Lines	Control lines	50.22	10.68	3.05	0.40	4.76	0.73
	Inbred lines	50.38	13.2	3.00	0.43	4.53	0.64
Gender	Females	51.1	11.87	3.03	0.44	5.04	0.56
	Males	49.38	12.16	3.03	0.39	4.18	0.53
Sd = Standard deviation.
